# Supplementary material for: Simultaneous Metabarcoding and Quantification of Neocallimastigomycetes from Environmental Samples: Insights into Community Composition and Novel Lineages
Source: MDPI journal article supplement (doi:10.3390/microorganisms10091749), 2022-08-30
Supplement: s1 [file s1]

| Taxonomy according to D1-D2/LSU phylogenetic analysis | ASV     | Cow   |               | Lama  |               | Elephant |                  | Mara  |               | Horse | Alpine Ibex | Alpaca | Kangaroo | Bison | Giraffe | Total read counts | Total clone count |
|-------------------------------------------------------|---------|-------|---------------|-------|---------------|----------|------------------|-------|---------------|-------|-------------|--------|----------|-------|---------|-------------------|-------------------|
|                                                       |         | reads | Sanger clones | reads | Sanger clones | reads    | Sanger clones    | reads | Sanger clones | reads | reads       | reads  | reads    | reads | reads   |                   |                   |
| <i>Neocallimastix frontalis</i>                       | ASV0001 | 829   |               | 484   | 1             | 32       |                  |       |               |       | 1897        | 2594   |          | 351   |         | 6187              | 1                 |
| <i>Neocallimastix frontalis</i>                       | ASV0002 | 564   |               |       |               |          |                  |       |               |       |             |        |          |       |         | 564               | 0                 |
| <i>Neocallimastix frontalis</i>                       | ASV0003 | 2578  | 6             |       |               | 941      | 3                |       |               |       | 4181        |        |          |       |         | 7700              | 9                 |
| <i>Neocallimastix frontalis</i>                       | ASV0004 | 444   | 1             |       |               |          |                  |       |               |       |             |        |          |       |         | 444               | 1                 |
| <i>Neocallimastix frontalis</i>                       | ASV0005 | 2461  | 1             | 23    |               | 232      | 2                |       |               |       | 273         | 486    |          | 81    |         | 3556              | 3                 |
| <i>Neocallimastix frontalis</i>                       | ASV0006 | 97    |               |       |               |          |                  |       |               |       |             |        |          |       |         | 97                | 0                 |
| <i>Neocallimastix frontalis</i>                       | ASV0007 | 336   |               |       |               | 361      | 2                |       |               |       |             |        |          |       |         | 697               | 2                 |
| <i>Neocallimastix frontalis</i>                       | ASV0008 | 1225  | 1             |       |               |          |                  |       |               |       |             |        |          |       |         | 1225              | 1                 |
| <i>Neocallimastix frontalis</i>                       | ASV0009 | 2302  | 2             | 444   |               | 935      | 4                |       |               | 62    | 1713        | 11383  |          | 1     |         | 16840             | 6                 |
| <i>Neocallimastix frontalis</i>                       | ASV0010 |       |               |       |               |          |                  |       |               |       |             |        |          | 293   |         | 293               | 0                 |
| <i>Neocallimastix frontalis</i>                       | ASV0011 | 250   | 1 (98.1%)     | 6     |               | 486      | 1                |       |               |       | 130         | 260    |          | 762   |         | 1894              | 2                 |
| <i>Neocallimastigaceae unclassified</i>               | ASV0012 |       |               |       |               |          |                  |       |               |       |             | 177    |          |       |         | 177               | 0                 |
| <i>Orpinomyces intercalaris</i>                       | ASV0013 |       |               | 1906  | 2             |          |                  |       |               |       |             | 291    | 24       |       |         | 2221              | 2                 |
| <i>Orpinomyces intercalaris</i>                       | ASV0014 |       |               | 58    | 1             |          |                  |       |               |       |             |        |          |       |         | 58                | 1                 |
| <i>Orpinomyces joyonii</i>                            | ASV0015 |       |               | 59    |               |          |                  |       |               |       |             | 46     |          |       |         | 105               | 0                 |
| <i>Orpinomyces intercalaris</i>                       | ASV0016 |       |               | 427   | 2             |          |                  |       |               |       |             |        |          |       |         | 427               | 2                 |
| <i>Orpinomyces intercalaris</i>                       | ASV0017 |       |               | 716   | 3             |          |                  |       |               |       |             |        |          |       |         | 716               | 3                 |
| <i>Orpinomyces intercalaris</i>                       | ASV0018 |       |               |       |               |          |                  |       |               |       |             |        |          | 106   |         | 106               | 0                 |
| <i>Orpinomyces joyonii</i>                            | ASV0019 |       |               |       |               |          |                  |       |               |       |             |        |          | 482   |         | 482               | 0                 |
| <i>Orpinomyces joyonii</i>                            | ASV0020 |       |               | 448   |               |          |                  |       |               |       |             | 783    |          | 5     |         | 1236              | 0                 |
| <i>Orpinomyces joyonii</i>                            | ASV0021 |       |               |       |               |          |                  |       |               |       |             |        |          | 178   |         | 178               | 0                 |
| <i>Orpinomyces joyonii</i>                            | ASV0022 |       |               |       |               |          |                  |       |               |       |             |        |          | 73    |         | 73                | 0                 |
| <i>Orpinomyces joyonii</i>                            | ASV0023 |       |               | 165   | 1             |          |                  |       |               |       |             | 745    |          | 492   |         | 1402              | 1                 |
| <i>Orpinomyces joyonii</i>                            | ASV0024 |       |               |       |               |          |                  |       |               |       |             |        |          | 1872  |         | 1872              | 0                 |
| <i>Orpinomyces joyonii</i>                            | ASV0025 |       |               | 93    | 1             |          |                  |       |               |       |             |        |          | 124   |         | 217               | 1                 |
| <i>Orpinomyces joyonii</i>                            | ASV0026 |       |               |       |               |          |                  |       |               |       |             | 194    |          |       |         | 194               | 0                 |
| <i>Orpinomyces joyonii</i>                            | ASV0027 |       |               | 932   | 4             |          |                  |       |               |       |             | 1461   |          |       |         | 2393              | 4                 |
| <i>Orpinomyces joyonii</i>                            | ASV0028 |       |               |       |               |          |                  |       |               | 25    |             |        |          |       |         | 25                | 0                 |
| <i>Piromyces communis</i>                             | ASV0030 |       |               |       |               |          |                  |       |               |       | 716         |        |          |       |         | 716               | 0                 |
| <i>Piromyces sp. 4</i>                                | ASV0031 | 1191  | 1             |       |               |          |                  |       |               |       |             |        |          |       |         | 1191              | 1                 |
| <i>Piromyces sp. 6</i>                                | ASV0032 |       |               |       |               | 15       |                  |       |               |       |             |        |          |       |         | 15                | 0                 |
| <i>Piromyces sp. 6</i>                                | ASV0033 |       | 1             |       | 1             | 3466     | 7<br>3 (98.73%)  |       |               |       |             |        |          |       |         | 3466              | 12                |
| <i>Cand. Piromyces potentiae</i>                      | ASV0034 |       |               |       |               |          |                  |       |               |       |             | 440    |          |       |         | 440               | 0                 |
| <i>Cand. Piromyces potentiae</i>                      | ASV0035 |       |               | 24    |               |          |                  |       |               |       |             |        |          |       |         | 24                | 0                 |
| <i>Cand. Piromyces potentiae</i>                      | ASV0036 |       |               | 282   | 1             |          |                  |       |               |       |             | 313    | 4        |       |         | 599               | 1                 |
| <i>Cand. Piromyces potentiae</i>                      | ASV0037 |       |               |       |               |          |                  |       |               |       |             |        |          | 75    |         | 75                | 0                 |
| <i>Cand. Piromyces potentiae</i>                      | ASV0038 | 60    |               |       |               |          |                  |       |               |       |             |        |          |       |         | 60                | 0                 |
| <i>Cand. Piromyces potentiae</i>                      | ASV0039 | 481   |               |       |               |          |                  |       |               |       |             |        |          |       |         | 481               | 0                 |
| <i>Cand. Piromyces potentiae</i>                      | ASV0040 |       | 5             |       |               | 3155     | 13<br>1 (98.73%) |       |               |       |             |        |          |       |         | 3155              | 19                |
| <i>Neocallimastigaceae genus 23 sp. 1</i>             | ASV0041 | 699   |               | 214   | 1             |          |                  |       |               |       | 500         | 657    |          | 116   |         | 2186              | 1                 |
| <i>Neocallimastigaceae genus 23 sp. 1</i>             | ASV0042 | 96    | 1             |       |               |          |                  |       |               |       |             |        |          |       |         | 96                | 1                 |
| <i>Neocallimastigaceae genus 23 sp. 1</i>             | ASV0043 |       |               | 257   |               |          |                  |       |               |       |             | 926    |          | 935   |         | 2118              | 0                 |
| <i>Neocallimastigaceae genus 23 sp. 1</i>             | ASV0044 | 487   | 4             |       |               |          |                  |       |               |       | 70          |        |          |       |         | 557               | 5                 |
| <i>Neocallimastigaceae genus 23 sp. 1</i>             | ASV0045 |       |               | 231   |               |          |                  |       |               |       |             |        |          | 390   |         | 621               | 0                 |
| <i>Neocallimastigaceae genus 23 sp. 1</i>             | ASV0046 |       |               |       |               |          |                  |       |               |       |             |        |          | 1     |         | 1                 | 0                 |

| Taxonomy according to D1-D2/LSU phylogenetic analysis | ASV     | Cow   |               | Lama  |               | Elephant |                  | Mara  |               | Horse | Alpine Ibex | Alpaca | Kangaroo | Bison | Giraffe | Total read counts | Total clone count |
|-------------------------------------------------------|---------|-------|---------------|-------|---------------|----------|------------------|-------|---------------|-------|-------------|--------|----------|-------|---------|-------------------|-------------------|
|                                                       |         | reads | Sanger clones | reads | Sanger clones | reads    | Sanger clones    | reads | Sanger clones | reads | reads       | reads  | reads    | reads | reads   |                   |                   |
| <i>Neocallimastigaceae</i> genus 23 sp. 2             | ASV0047 |       |               |       |               |          |                  |       |               |       |             | 366    |          |       |         | 366               | 0                 |
| <i>Neocallimastigaceae</i> genus 23 sp. 3             | ASV0048 |       |               |       |               |          |                  |       |               |       |             | 453    |          | 296   |         | 749               | 0                 |
| <i>Neocallimastigaceae</i> genus 23 sp. 3             | ASV0049 |       |               | 396   | 1             |          |                  |       |               |       |             | 391    |          |       |         | 787               | 1                 |
| <i>Cyllamyces aberensis</i>                           | ASV0050 |       |               |       |               |          |                  |       |               |       |             |        |          | 1502  |         | 1502              | 0                 |
| <i>Cyllamyces unclassified</i>                        | ASV0051 |       |               |       |               |          |                  |       |               |       |             |        |          | 29    |         | 29                | 0                 |
| <i>Cyllamyces unclassified</i>                        | ASV0052 |       |               |       |               |          |                  |       |               |       |             |        |          | 344   |         | 344               | 0                 |
| <i>Cyllamyces unclassified</i>                        | ASV0053 |       |               |       |               |          |                  |       |               |       |             |        |          | 68    |         | 68                | 0                 |
| <i>Cyllamyces unclassified</i>                        | ASV0054 |       |               |       |               |          |                  |       |               |       |             |        |          | 83    |         | 83                | 0                 |
| <i>Cyllamyces unclassified</i>                        | ASV0055 |       |               |       |               |          |                  |       |               |       |             |        |          | 422   |         | 422               | 0                 |
| <i>Cyllamyces unclassified</i>                        | ASV0056 |       |               | 83    |               |          |                  |       |               |       |             |        |          |       |         | 83                | 0                 |
| <i>Cyllamyces unclassified</i>                        | ASV0057 |       |               | 113   | 3             |          |                  |       |               |       |             |        |          |       |         | 113               | 3                 |
| <i>Cyllamyces unclassified</i>                        | ASV0058 |       |               |       |               |          |                  |       |               |       |             | 132    |          |       |         | 132               | 0                 |
| <i>Cyllamyces unclassified</i>                        | ASV0059 |       |               |       |               |          |                  |       |               |       |             |        |          | 199   |         | 199               | 0                 |
| <i>Cyllamyces unclassified</i>                        | ASV0060 |       |               |       |               |          |                  |       |               |       |             |        |          | 1114  |         | 1114              | 0                 |
| <i>Cyllamyces unclassified</i>                        | ASV0061 |       |               | 32    |               |          |                  |       |               |       |             | 298    |          | 5647  |         | 5977              | 0                 |
| <i>Cyllamyces unclassified</i>                        | ASV0062 |       |               | 137   |               |          |                  |       |               |       |             |        |          |       |         | 137               | 0                 |
| <i>Cyllamyces unclassified</i>                        | ASV0063 |       |               |       |               |          |                  |       |               |       |             |        |          | 1181  |         | 1181              | 0                 |
| <i>Cyllamyces unclassified</i>                        | ASV0064 |       |               |       |               |          |                  |       |               |       |             |        |          | 2955  |         | 2955              | 0                 |
| <i>Cyllamyces unclassified</i>                        | ASV0065 |       |               |       |               |          |                  |       |               |       |             |        |          | 197   |         | 197               | 0                 |
| <i>Cyllamyces unclassified</i>                        | ASV0066 |       |               |       |               |          |                  |       |               |       |             |        |          | 40    |         | 40                | 0                 |
| <i>Cyllamyces unclassified</i>                        | ASV0067 |       |               |       |               |          |                  |       |               |       |             |        |          | 200   |         | 200               | 0                 |
| <i>Cyllamyces unclassified</i>                        | ASV0068 |       |               |       |               |          |                  |       |               |       |             |        |          | 7     |         | 7                 | 0                 |
| <i>Cyllamyces unclassified</i>                        | ASV0069 |       |               |       |               |          |                  |       |               |       |             | 116    |          |       |         | 116               | 0                 |
| <i>Cyllamyces unclassified</i>                        | ASV0070 |       |               | 254   |               |          |                  |       |               |       |             |        |          | 2101  |         | 2355              | 0                 |
| <i>Cyllamyces unclassified</i>                        | ASV0071 |       |               |       |               |          |                  |       |               |       |             |        |          | 546   |         | 546               | 0                 |
| <i>Cyllamyces unclassified</i>                        | ASV0072 |       |               |       |               |          |                  |       |               |       |             |        |          | 147   |         | 147               | 0                 |
| <i>Cyllamyces unclassified</i>                        | ASV0073 |       |               |       |               |          |                  |       |               |       |             |        |          | 44    |         | 44                | 0                 |
| <i>Cyllamyces unclassified</i>                        | ASV0074 |       |               |       |               |          |                  |       |               |       |             |        |          | 483   |         | 483               | 0                 |
| <i>Cyllamyces unclassified</i>                        | ASV0075 |       |               |       |               |          |                  |       |               |       |             |        |          | 36    |         | 36                | 0                 |
| <i>Cyllamyces unclassified</i>                        | ASV0076 |       |               |       |               |          |                  |       |               |       |             |        |          | 80    |         | 80                | 0                 |
| <i>Cyllamyces unclassified</i>                        | ASV0077 |       |               |       |               |          |                  |       |               |       |             |        |          | 19    |         | 19                | 0                 |
| <i>Cyllamyces unclassified</i>                        | ASV0078 |       |               |       |               |          |                  |       |               |       |             |        |          | 192   |         | 192               | 0                 |
| <i>Caecomycetes churrovii</i>                         | ASV0079 |       |               |       |               |          |                  |       |               |       |             |        |          | 787   |         | 787               | 0                 |
| <i>Caecomycetes churrovii</i>                         | ASV0080 |       |               | 299   |               |          |                  |       |               |       |             | 851    |          |       |         | 1150              | 0                 |
| <i>Caecomycetes churrovii</i>                         | ASV0081 | 621   |               | 193   |               |          |                  |       |               | 21    | 8863        | 621    |          |       |         | 10319             | 0                 |
| <i>Caecomycetes churrovii</i>                         | ASV0082 | 15791 | 13            |       |               |          |                  |       |               |       |             |        |          |       | 1693    | 17484             | 14                |
| <i>Caecomycetes churrovii</i>                         | ASV0083 |       |               |       |               | 6296     | 15<br>2 (98.73%) |       |               |       |             |        |          |       |         | 6296              | 17                |
| <i>Caecomycetes communis</i>                          | ASV0084 |       |               |       |               |          | 1                |       |               |       | 10880       |        |          |       |         | 10880             | 1                 |
| <i>Paucimycetes sp. 2</i>                             | ASV0085 |       |               | 46    |               |          |                  |       |               |       |             |        |          |       |         | 46                | 0                 |
| <i>Paucimycetes sp. 2</i>                             | ASV0086 |       |               | 605   |               |          |                  |       |               |       |             |        |          | 169   |         | 774               | 0                 |
| <i>Feramyces austinii</i>                             | ASV0087 |       |               |       |               |          |                  |       |               |       |             |        |          |       | 99      | 99                | 0                 |
| <i>Feramyces austinii</i>                             | ASV0088 |       |               |       |               |          |                  |       |               |       |             |        |          |       | 9589    | 9589              | 0                 |
| <i>Feramyces austinii</i>                             | ASV0089 |       |               |       |               |          |                  |       |               |       |             |        |          |       | 816     | 816               | 0                 |
| <i>Feramyces austinii</i>                             | ASV0090 |       |               |       |               |          |                  |       |               |       |             |        |          |       | 3785    | 3785              | 0                 |
| <i>Feramyces austinii</i>                             | ASV0091 |       |               |       |               |          |                  |       |               |       |             |        |          |       | 104     | 104               | 0                 |
| <i>Feramyces austinii</i>                             | ASV0092 |       |               |       |               |          |                  |       |               |       |             |        |          |       | 13      | 13                | 0                 |
| <i>Feramyces austinii</i>                             | ASV0093 |       |               |       |               |          |                  |       |               |       |             |        |          |       | 1058    | 1058              | 0                 |

| Taxonomy according to D1-D2/LSU phylogenetic analysis | ASV     | Cow   |               | Lama  |               | Elephant |               | Mara  |                     | Horse | Alpine Ibex | Alpaca | Kangaroo | Bison | Giraffe | Total read counts | Total clone count |
|-------------------------------------------------------|---------|-------|---------------|-------|---------------|----------|---------------|-------|---------------------|-------|-------------|--------|----------|-------|---------|-------------------|-------------------|
|                                                       |         | reads | Sanger clones | reads | Sanger clones | reads    | Sanger clones | reads | Sanger clones       | reads | reads       | reads  | reads    | reads | reads   |                   |                   |
| <i>Feromyces austinii</i>                             | ASV0094 |       |               |       |               |          |               |       |                     |       |             |        |          |       | 3281    | 3281              | 0                 |
| <i>Feromyces austinii</i>                             | ASV0095 |       |               |       |               |          |               |       |                     |       |             |        |          |       | 13408   | 13408             | 0                 |
| <i>Neocallimastigaceae</i> genus 24 unclassified      | ASV0096 |       |               |       |               |          |               |       |                     |       |             | 824    |          |       |         | 824               | 0                 |
| <i>Neocallimastigaceae</i> genus 24 unclassified      | ASV0097 |       |               |       |               |          |               |       |                     |       | 856         |        |          |       |         | 856               | 0                 |
| <i>Neocallimastigaceae</i> genus 24 unclassified      | ASV0098 |       |               |       |               |          |               |       |                     |       | 436         |        |          |       |         | 436               | 0                 |
| <i>Neocallimastigaceae</i> genus 24 unclassified      | ASV0099 |       |               | 103   |               |          |               |       |                     |       |             |        |          |       |         | 103               | 0                 |
| <i>Neocallimastigaceae</i> genus 24 unclassified      | ASV0100 |       |               | 477   |               |          |               |       |                     |       |             |        |          |       |         | 477               | 0                 |
| <i>Neocallimastigaceae</i> genus 24 unclassified      | ASV0101 |       |               | 54    |               |          |               |       |                     |       |             |        |          |       |         | 54                | 0                 |
| <i>Neocallimastigaceae</i> genus 24 unclassified      | ASV0102 |       |               | 277   |               |          |               |       |                     |       |             |        |          |       |         | 277               | 0                 |
| <i>Neocallimastigaceae</i> genus 25 unclassified      | ASV0103 |       |               |       |               |          |               |       |                     |       |             | 228    |          | 3871  |         | 4099              | 0                 |
| <i>Neocallimastigaceae</i> genus 25 unclassified      | ASV0104 |       |               |       |               |          |               |       |                     |       |             | 181    |          | 2442  |         | 2623              | 0                 |
| <i>Anaeromyces mucronatus</i>                         | ASV0105 |       |               |       |               |          |               |       |                     |       |             | 263    |          |       |         | 263               | 0                 |
| <i>Anaeromyces mucronatus</i>                         | ASV0106 |       |               | 853   | 1             |          |               |       |                     |       |             | 400    |          |       |         | 1253              | 1                 |
| <i>Anaeromyces mucronatus</i>                         | ASV0107 |       |               |       |               |          |               |       |                     |       |             | 405    |          |       |         | 405               | 0                 |
| <i>Anaeromyces mucronatus</i>                         | ASV0108 |       |               | 307   |               |          |               |       |                     |       |             |        |          |       |         | 307               | 0                 |
| <i>Anaeromyces mucronatus</i>                         | ASV0109 |       |               |       |               |          |               |       |                     |       |             | 83     |          |       |         | 83                | 0                 |
| <i>Anaeromyces mucronatus</i>                         | ASV0110 |       |               | 909   | 1             |          |               |       |                     |       |             |        |          |       |         | 909               | 1                 |
| <i>Anaeromyces mucronatus</i>                         | ASV0111 |       |               | 624   | 2             |          |               |       |                     |       |             | 68     |          |       |         | 692               | 2                 |
| <i>Anaeromyces mucronatus</i>                         | ASV0112 |       |               |       |               |          |               |       |                     |       |             |        |          | 187   |         | 187               | 0                 |
| <i>Anaeromyces mucronatus</i>                         | ASV0113 |       |               |       |               |          |               |       |                     |       |             |        |          | 148   |         | 148               | 0                 |
| <i>Anaeromyces mucronatus</i>                         | ASV0114 |       |               |       |               |          |               |       |                     |       |             | 60     | 24       |       |         | 84                | 0                 |
| <i>Neocallimastigaceae</i> genus 21 unclassified      | ASV0115 |       |               | 521   |               |          |               |       |                     |       |             | 76     |          |       |         | 597               | 0                 |
| <i>Neocallimastigaceae</i> genus 21 unclassified      | ASV0116 |       |               |       |               |          |               |       |                     |       | 185         |        |          |       |         | 185               | 0                 |
| <i>Neocallimastigaceae</i> genus 26 unclassified      | ASV0117 |       |               |       |               |          |               |       |                     |       | 19          |        | 26079    |       |         | 26098             | 0                 |
| <i>Neocallimastigaceae</i> genus 26 unclassified      | ASV0118 |       |               |       |               |          |               |       |                     |       |             |        | 146      |       |         | 146               | 0                 |
| <i>Neocallimastigaceae</i> genus 26 unclassified      | ASV0119 |       |               |       |               |          |               |       |                     |       |             |        |          | 58    |         | 58                | 0                 |
| <i>Neocallimastigaceae</i> genus 22 unclassified      | ASV0120 |       |               |       |               |          |               | 13852 | 34<br>1<br>(98.73%) |       |             |        |          |       |         | 13852             | 35                |
| <i>Neocallimastigaceae</i> genus 22 unclassified      | ASV0121 |       |               |       |               |          |               | 6095  | 7                   |       |             |        |          |       |         | 6095              | 7                 |
| <i>Neocallimastigaceae</i> genus 22 unclassified      | ASV0122 |       |               |       |               |          |               | 5619  | 11                  |       |             |        |          |       |         | 5619              | 11                |
| <i>Khoyollomyces ramosus</i>                          | ASV0123 |       |               |       |               |          |               |       |                     | 2903  |             |        |          |       |         | 2903              | 0                 |

| Taxonomy according to D1-D2/LSU<br>phylogenetic analysis | ASV     | Cow   |                  | Lama  |                  | Elephant |                  | Mara  |                  | Horse | Alpine Ibex | Alpaca | Kangaroo | Bison | Giraffe | Total read<br>counts | Total clone<br>count |
|----------------------------------------------------------|---------|-------|------------------|-------|------------------|----------|------------------|-------|------------------|-------|-------------|--------|----------|-------|---------|----------------------|----------------------|
|                                                          |         | reads | Sanger<br>clones | reads | Sanger<br>clones | reads    | Sanger<br>clones | reads | Sanger<br>clones | reads | reads       | reads  | reads    | reads | reads   |                      |                      |
| <i>Khoyollomyces ramosus</i>                             | ASV0124 |       |                  |       |                  | 99       |                  |       |                  | 11645 |             |        |          |       |         | 11744                | 0                    |
| <i>Khoyollomyces ramosus</i>                             | ASV0125 |       |                  |       |                  |          |                  |       |                  | 203   |             |        |          |       |         | 203                  | 0                    |
| <i>Khoyollomyces ramosus</i>                             | ASV0126 |       |                  |       |                  |          |                  |       |                  | 1891  |             |        |          |       |         | 1891                 | 0                    |
| <i>Khoyollomyces ramosus</i>                             | ASV0127 |       |                  |       |                  |          |                  |       |                  | 103   |             |        |          |       |         | 103                  | 0                    |
| <i>Khoyollomyces ramosus</i>                             | ASV0128 |       |                  |       |                  |          |                  |       |                  | 521   |             |        |          |       |         | 521                  | 0                    |
| <i>Khoyollomyces ramosus</i>                             | ASV0129 |       |                  |       |                  |          |                  |       |                  | 4172  |             |        |          |       |         | 4172                 | 0                    |
| <i>Khoyollomyces ramosus</i>                             | ASV0130 |       |                  |       |                  |          |                  |       |                  | 2604  |             |        |          |       |         | 2604                 | 0                    |
| Total count                                              | 129     | 30512 | 37               | 13052 | 26               | 16018    | 54               | 25566 | 53               | 24150 | 30719       | 26572  | 26277    | 31931 | 33846   | 258643               |                      |
| ASVs per sample                                          |         | 18    | 12               | 37    | 16               | 11       | 9                | 3     | 3                | 11    | 15          | 34     | 5        | 50    | 10      |                      |                      |
| Clone total count                                        |         |       |                  |       |                  |          |                  |       |                  |       |             |        |          |       |         |                      | 172                  |
