# Supplementary material for: Simultaneous Metabarcoding and Quantification of Neocallimastigomycetes from Environmental Samples: Insights into Community Composition and Novel Lineages
Source: MDPI journal article supplement (doi:10.3390/microorganisms10091749), 2022-08-30
Supplement: s1 [file s1]

Supplementary Data S2. Abundance of clones (Sanger sequenced) and ASV reads (Illumina sequenced) displaying the *Neocallimastigomyces* community in the 10 fecal samples.
