# Supplementary material for: Simultaneous Metabarcoding and Quantification of Neocallimastigomycetes from Environmental Samples: Insights into Community Composition and Novel Lineages
Source: MDPI journal article supplement (doi:10.3390/microorganisms10091749), 2022-08-30
Supplement: s1 [file s1]

Supplementary Data S1: Primers targeting the D2 region from the 28S large subunit designed using Primrose 2.17 and tested in silico to determine their specificity for Neocallimastigomycetes.

| Primer                           | Sequence 5' -> 3'        |
|----------------------------------|--------------------------|
| 1_69489_57C                      | CCTTKACGAATTGTAGTTTAWAGA |
| 2_71389_59C                      | GATACACTTTCAAMGAGUCGGA   |
| 3_72987_58C                      | GCGTTTGACACCAGTGTGT      |
| 4_739344_57C                     | ATGCACTTTTCRKTTAACAAGTC  |
| 5_76533_52C                      | YATAGACAACCTGTTGACTAT    |
| 6_74895_57C                      | TGAGGHCWGCAGCGTARA       |
| 7_GGNL1F_57C                     | CATAGAGGGTGAGAATCCCGTA   |
| 8_GGNL1R_56C_modif               | TACCTACGCTTAGGATGTTGA    |
| 9_AF-LSU rev 1.3.1._45-60C modif | GCACTTYTYRKKKWACAAGTC    |
