# Supplementary material for: Simultaneous Metabarcoding and Quantification of Neocallimastigomycetes from Environmental Samples: Insights into Community Composition and Novel Lineages
Source: Microorganisms. 2022 Aug 30;10(9):1749. doi: 10.3390/microorganisms10091749 (PMC9504928; doi:10.3390/microorganisms10091749)
Supplement: Supplementary file 1 [file microorganisms-10-01749-s001.zip]

Archive with 7 entries (7 files):
- 1_Suplementary Data S1.pdf
- 2_Supplementary Data S2 text.pdf
- 3_Suplementary Data S2 Table ASV-Clones.pdf
- 4_Supplementary Data S3 text.pdf
- 5_Supplementary Data S3 D1-D2 complete.pdf
- 6_Supplementary Data S4 text.pdf
- 7_Supplementary Data S4 D2 complete.pdf
