# Supplementary figures and images for: Simultaneous Metabarcoding and Quantification of Neocallimastigomycetes from Environmental Samples: Insights into Community Composition and Novel Lineages
Source: MDPI journal article supplement (doi:10.3390/microorganisms10091749), 2022-08-30

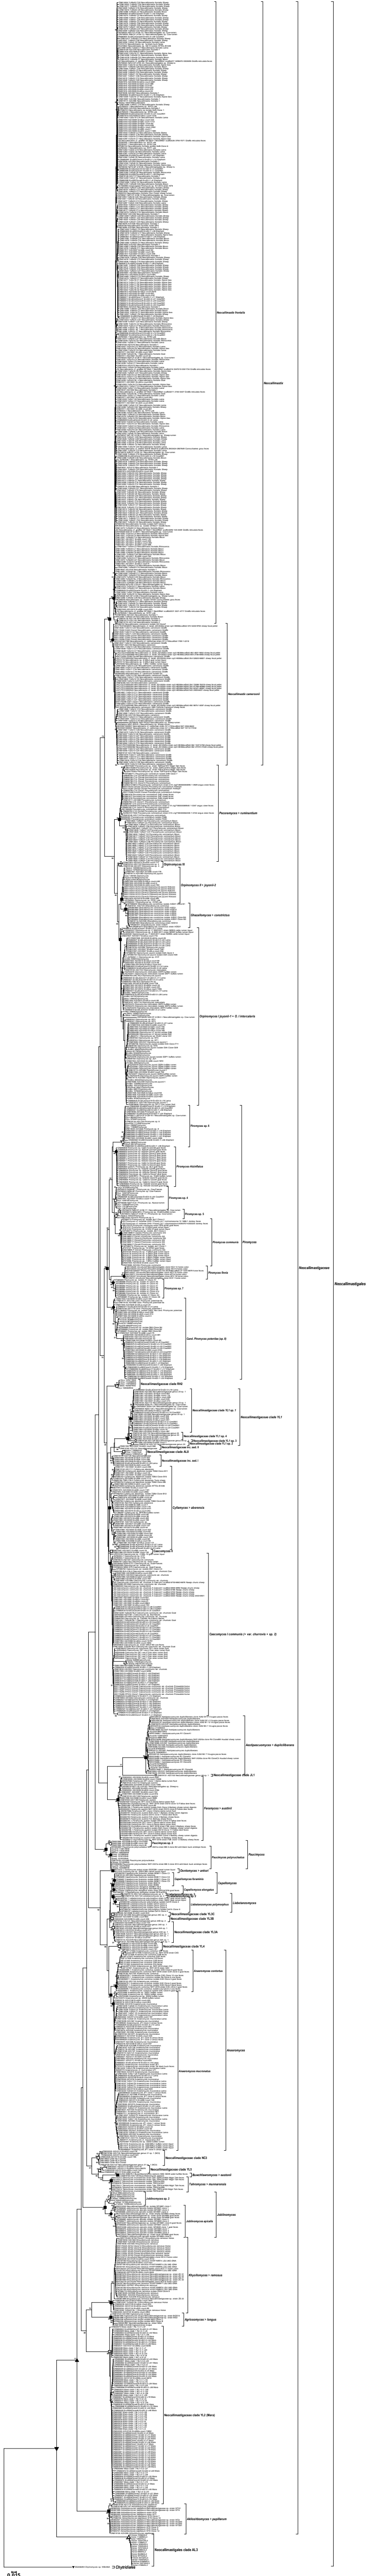

Supplement: s1 [file s1]

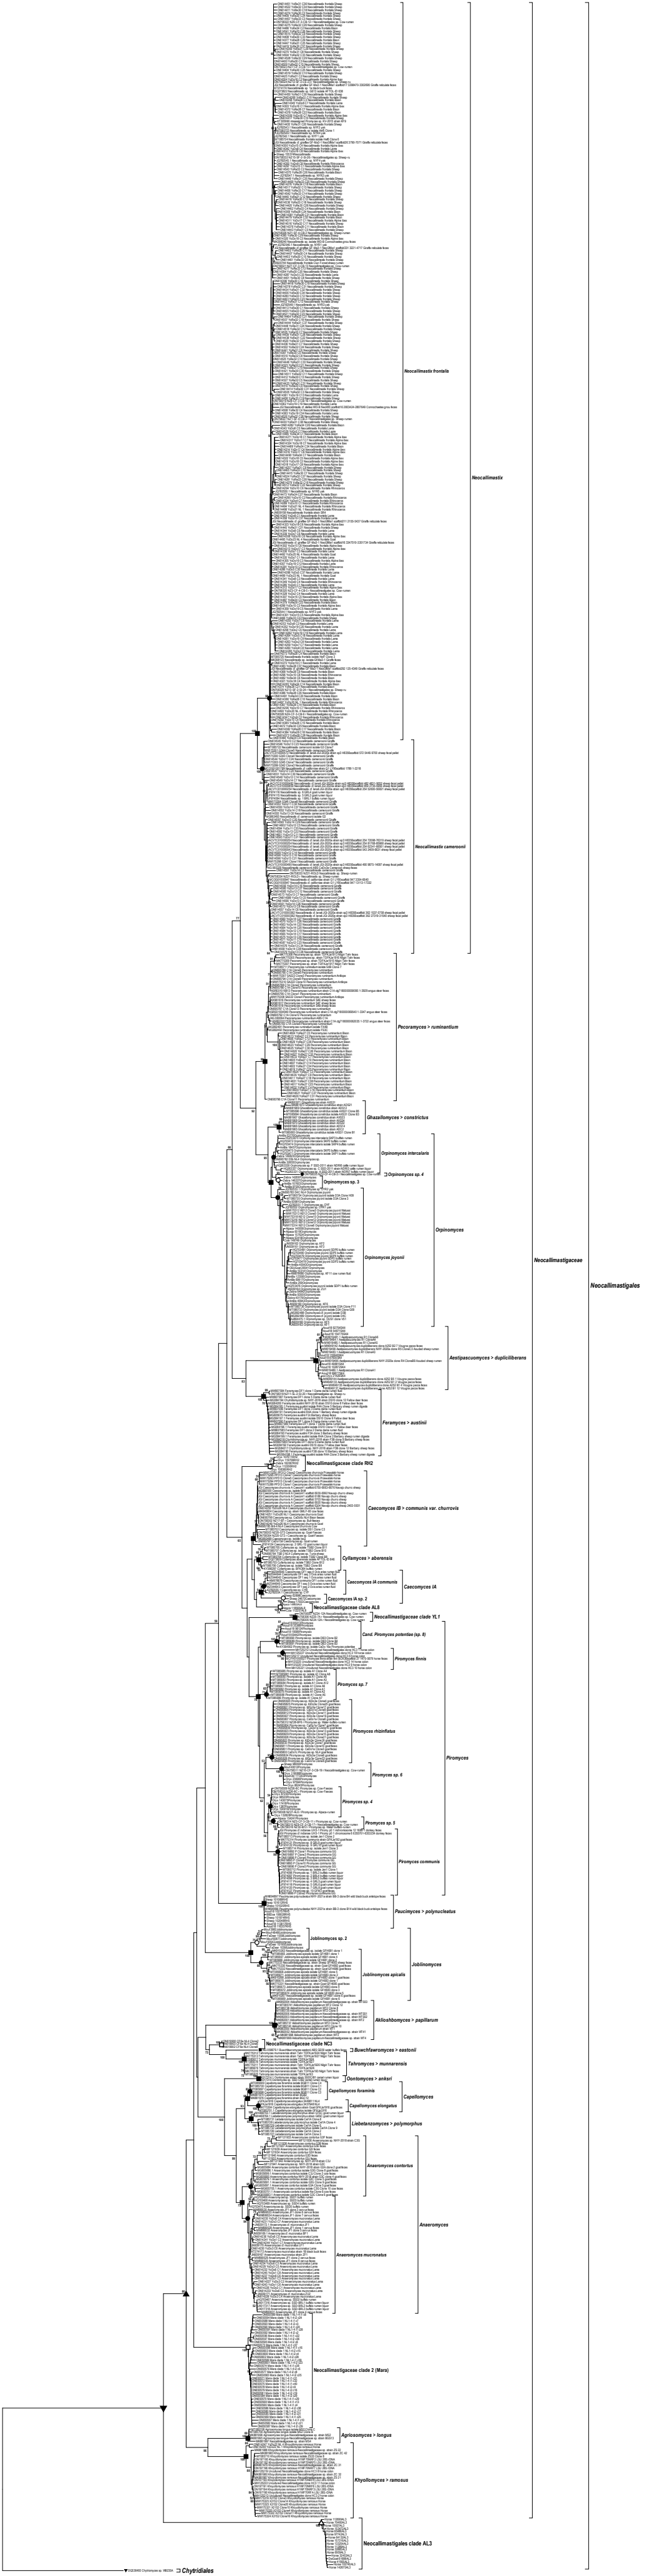

Supplement: s1 [file s1]
